# Supplementary material for: Downregulation of DROSHA: Could It Affect miRNA Biogenesis in Endometriotic Menstrual Blood Mesenchymal Stem Cells?
Source: MDPI journal article supplement (doi:10.3390/ijms24065963), 2023-03-22
Supplement: s1 [file s1]

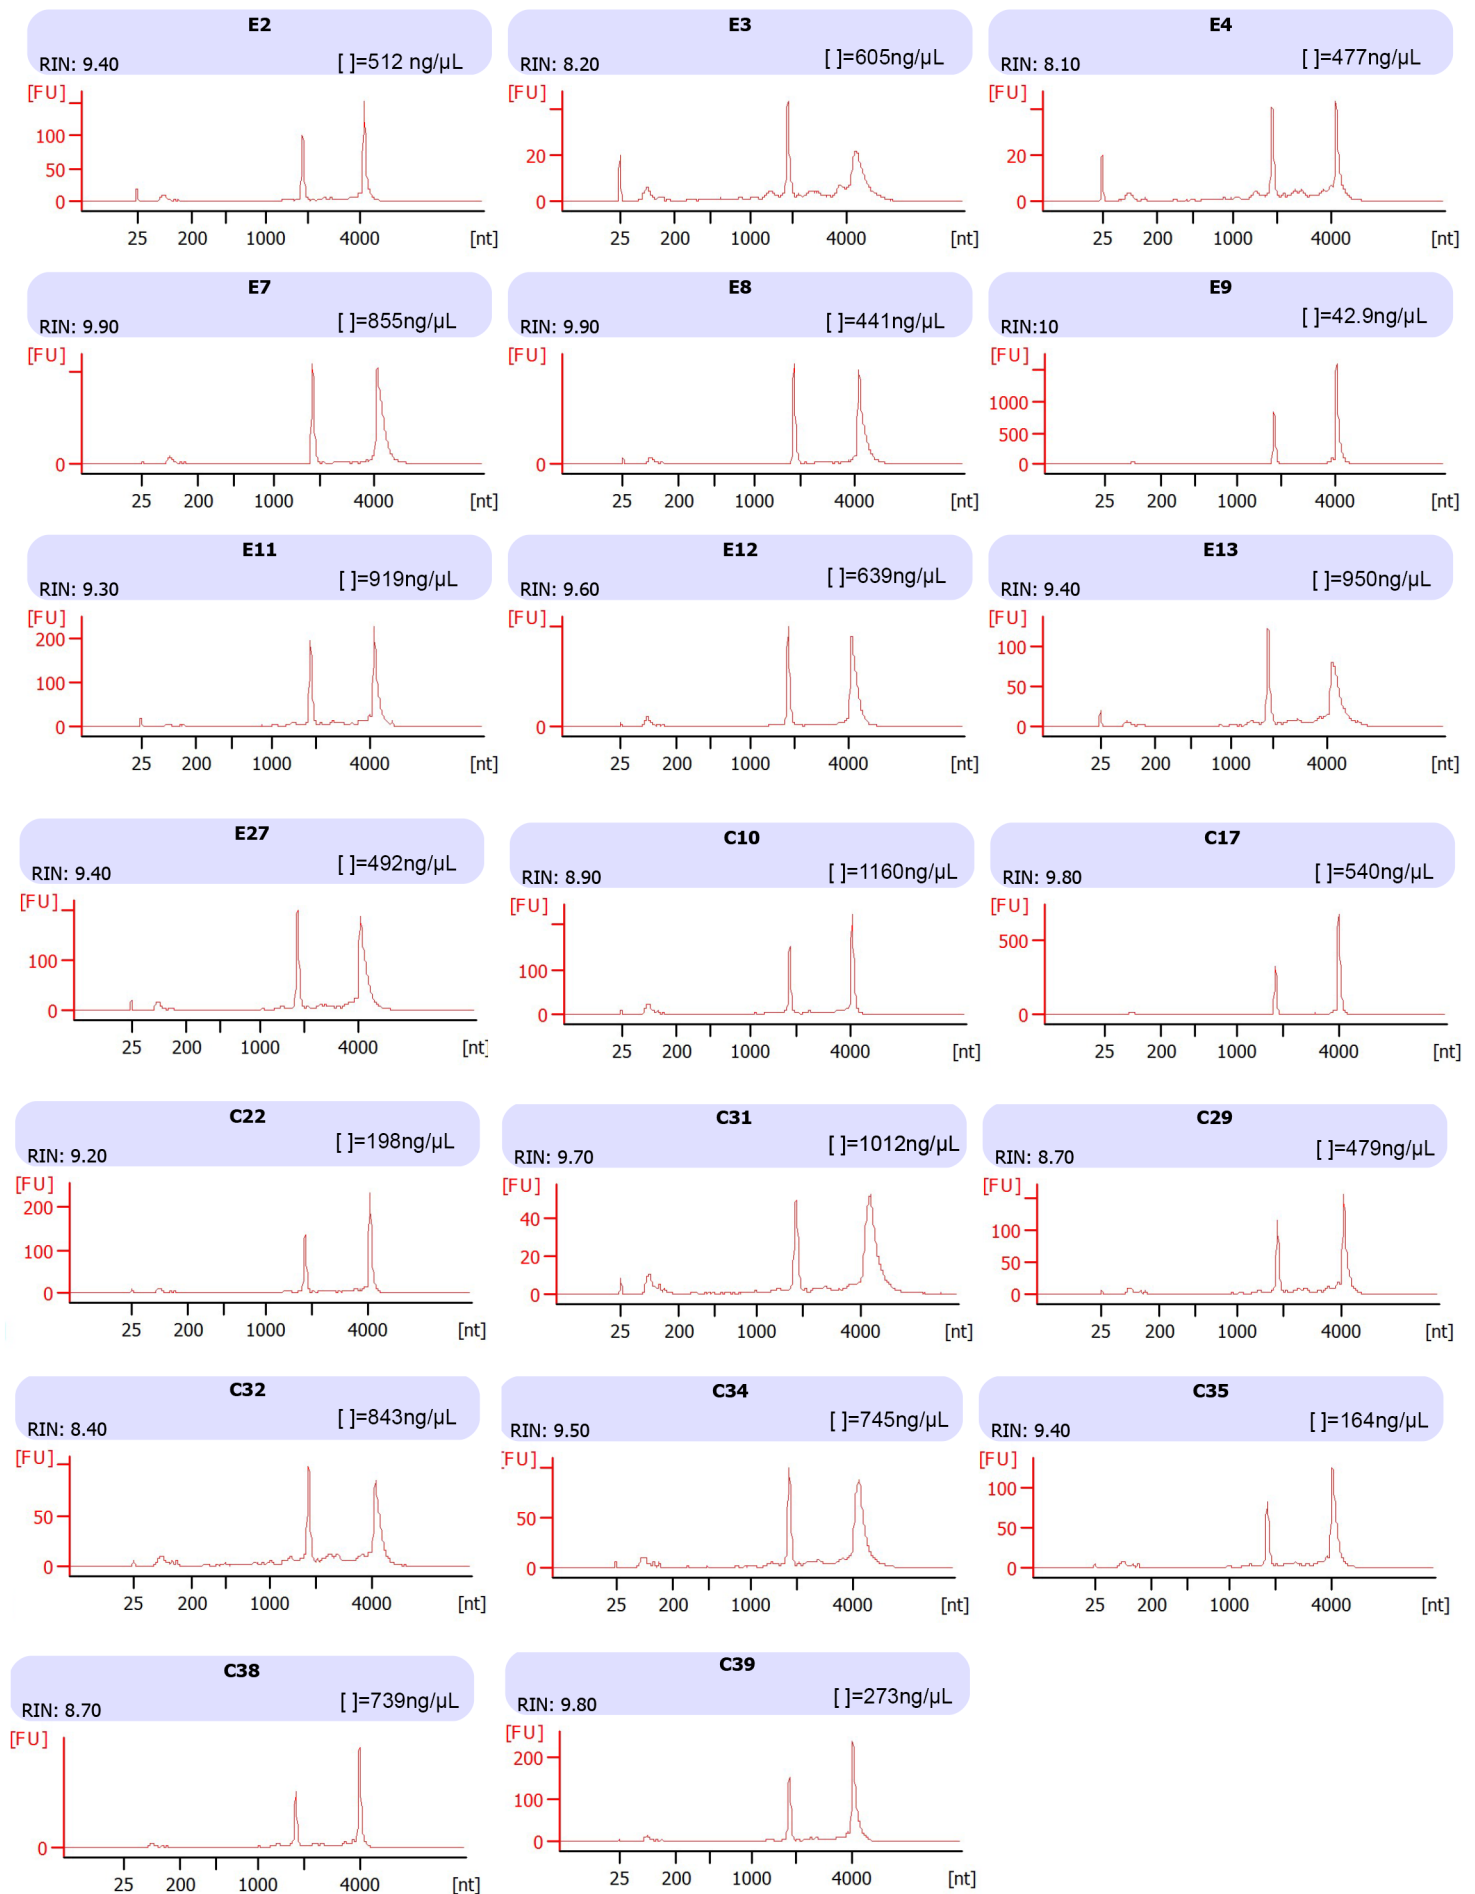

Figure S1: Electropherograms showing the integrity of the total RNA of each sample. The RNA integrity number (RIN) was performed using Agilent 2100 Expert B.02.07.SI532 software. The letters E and C represent, respectively, endometriosis and control. [ ] = RNA concentration obtained by the Qubit 2.0 fluorometer. The two largest peaks represent 18S and 28S rRNA, respectively.
